# Supplementary material for: Flocking ferromagnetic colloids
Source: PubMed Central journal article supplement — Sci Adv. 2017 Feb 15;3(2):e1601469. doi: 10.1126/sciadv.1601469 (PMC5310830; doi:10.1126/sciadv.1601469), 2017-02-15
Supplement: 1601469_SM.pdf [file 1601469_SM.pdf]

## Supplementary Materials for

### **Flocking ferromagnetic colloids**

Andreas Kaiser, Alexey Snezhko, Igor S. Aranson

Published 15 February 2017, *Sci. Adv.* **3**, e1601469 (2017)

DOI: 10.1126/sciadv.1601469

**Other Supplementary Material for this manuscript includes the following:**  
(available at [advances.sciencemag.org/cgi/content/full/3/2/e1601469/DC1](https://advances.sciencemag.org/cgi/content/full/3/2/e1601469/DC1))

- movie S1 (.avi format). Experimental movie for the gas-like state at frequency  $f = 20$  Hz.
- movie S2 (.avi format). Experimental movie for the flocking state at frequency  $f = 30$  Hz.
- movie S3 (.avi format). Animation of the experimentally obtained flocking state at frequency  $f = 30$  Hz, where the direction of motion is indicated by the color code.
- movie S4 (.avi format). Experimental movie for the vortex state at frequency  $f = 40$  Hz.
- movie S5 (.avi format). Animation of the experimentally obtained vortex state at frequency  $f = 40$  Hz, where the direction of motion is indicated by the color code.
- movie S6 (.avi format). Experimental movie for the reentrant flocking state at frequency  $f = 50$  Hz.
- movie S7 (.avi format). Animation of the experimentally obtained reentrant flocking state at frequency  $f = 50$  Hz, where the direction of motion is indicated by the color code.
- movie S8 (.avi format). Experimental movie for the gas-like state at frequency  $f = 60$  Hz.
- movie S9 (.avi format). Numerically obtained gas-like state at frequency  $f = 6$  Hz, indicating the direction of motion by the color code.
- movie S10 (.avi format). Numerically obtained flocking state at frequency  $f = 20$  Hz, indicating the direction of motion by the color code.
- movie S11 (.avi format). Numerically obtained vortex state at frequency  $f = 47$  Hz, indicating the direction of motion by the color code.

- movie S12 (.avi format). Numerically obtained reentrant flocking state at frequency  $f = 88$  Hz, indicating the direction of motion by the color code.
- movie S13 (.avi format). Numerically obtained vortex state, considering hydrodynamic interactions, at frequency  $f = 47$  Hz, indicating the direction of motion by the color code.
